# Supplementary material for: Mechano-Chemical Synthesis, Structural Features and Optical Gap of Hybrid CH3NH3CdBr3 Perovskite
Source: MDPI journal article supplement (doi:10.3390/ma14206039), 2021-10-13
Supplement: s1 [file s1]

# Mechano-Chemical Synthesis, Structural Features and Optical Gap of Hybrid $\text{CH}_3\text{NH}_3\text{CdBr}_3$ Perovskite

José Antonio Alonso <sup>1,\*</sup>, Paula Kayser <sup>1,2</sup>, Bo-Kyung Hong <sup>1,3</sup>, María Consuelo Álvarez-Galván <sup>3</sup>, Francois Fauth <sup>4</sup> and Carlos Alberto López <sup>5,\*</sup>

<sup>1</sup> Instituto de Ciencia de Materiales de Madrid, Consejo Superior de Investigaciones Científicas, Cantoblanco 28049 Madrid, Spain; Pakayser@ucm.es (P.K.); sally.bkhong@ies.upm.es (B.-K.H.)

<sup>2</sup> Departamenton de Química Inorgánica, Facultad de Ciencias Químicas, Universidad Compluense de Madrid, 28040 Madrid, Spain

<sup>3</sup> Instituto de Catálisis y Petroleoquímica, Consejo Superior de Investigaciones Científicas, Cantoblanco 28049 Madrid, Spain; c.alvarez@icp.csic.es

<sup>4</sup> CELLS-ALBA synchrotron Light Facility, Cerdanyola del Valles, Barcelona, E-08290, Spain; ffauth@cells.es

<sup>5</sup> Instituto de Investigación en Tecnología Química (UNSL-CONICET) and Facultad de Química, Bioquímica y Farmacia, Universidad Nacional de San Luis, Almirante Brown 1455, San Luis, 5700, Argentina

\* Correspondence: ja.alonso@icmm.csic.es (J.A.A.); calopez@unsl.edu.ar (C.A.L.)

**Citation:** Alonso, J.A.; Kayser, P.; Hong, B.-K.; Álvarez-Galván, M.C.; Fauth, F.; López, C.A. Mechano-Chemical Synthesis, Structural Features and Optical Gap of Hybrid  $\text{CH}_3\text{NH}_3\text{CdBr}_3$  Perovskite. *Materials* **2021**, *14*, x. Nhttps://doi.org/10.3390/xxxxx

Academic Editor: Marc Cretin; Sophie Tingry; Zhenghua Tang

Received: 25 August 2021

Accepted: 8 October 2021

Published: date

**Publisher's Note:** MDPI stays neutral with regard to jurisdictional claims in published maps and institutional affiliations.

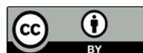

**Copyright:** © 2021 by the authors. Submitted for possible open access publication under the terms and conditions of the Creative Commons Attribution (CC BY) license (<https://creativecommons.org/licenses/by/4.0/>).

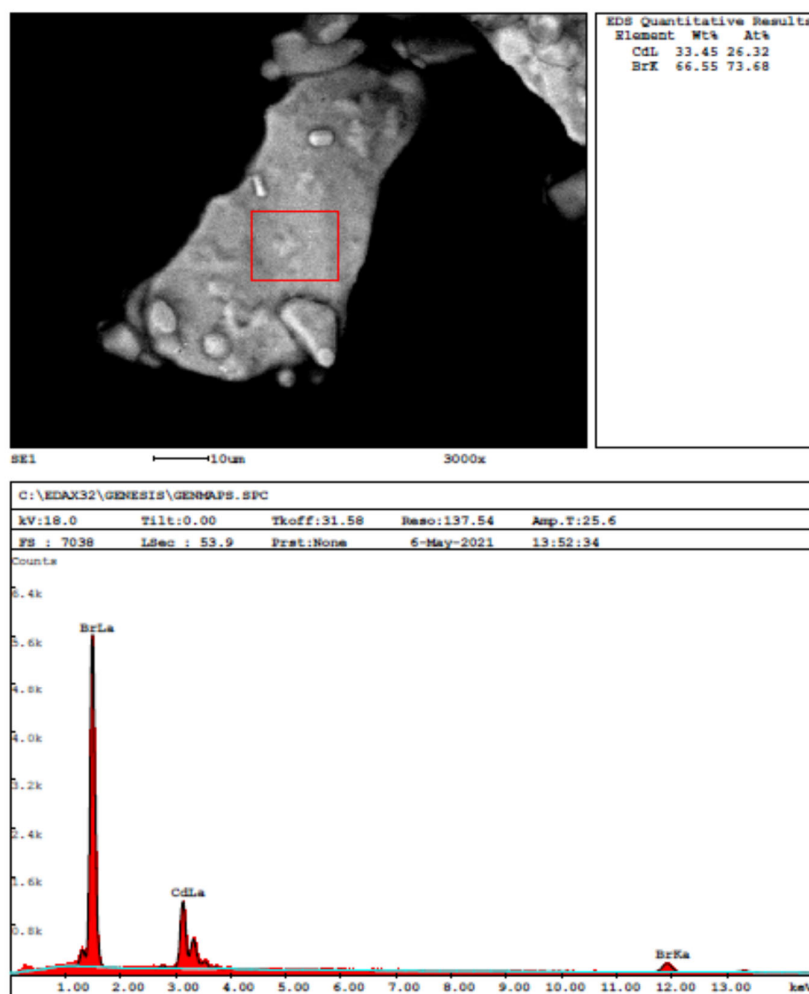

**Figure S1.** EDX spectrum and quantitative results for  $\text{MACdBr}_3$  obtained with 18 kv of acceleration potential. H, N and C could not be observed in the presence of heavy Cd and Br atoms. The theoretical Cd/Br ratio of 1:3 is close to that found of 26.32%/73.68%.

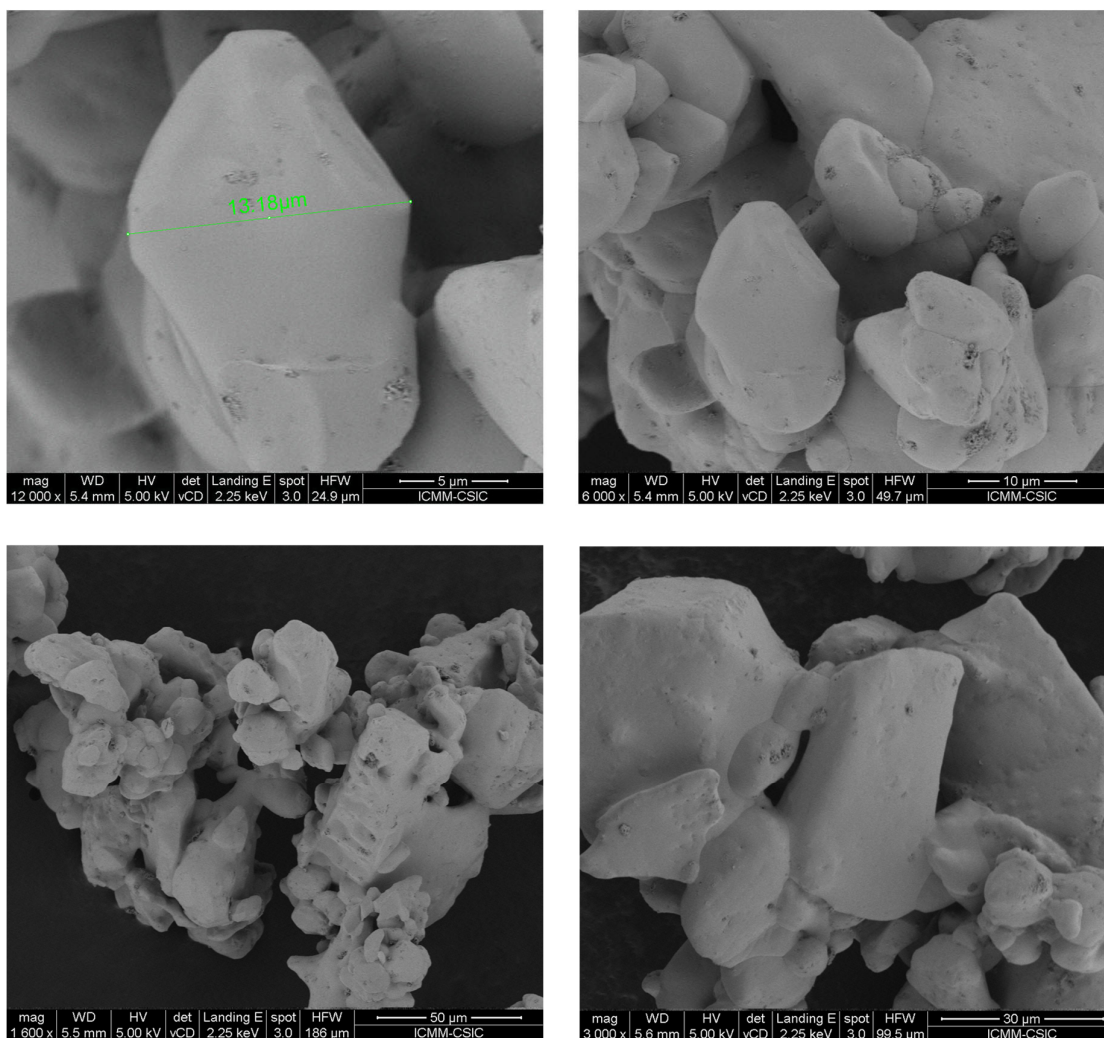

**Figure S2.** FE-SEM images of MACdBr<sub>3</sub> with different magnifications, illustrating the overall aspect of this material obtained by ball milling.
